# Supplementary material
Source: publisher figshare collection journal article supplement (https://springernature.figshare.com/ndownloader/files/37492693)
Supplement: Supplementary file 1 [file 37492693]

## Sheet: Ext Data Fig. 1c
Extended Data Fig. 1c
B16 CRISPR cell lines - in vitro cell growth
Cell Titer Glo
Day		Control sg1									Control sg2									Tbk1 (sg1)									Tbk1 (sg2)
1		66988	80204	86145	83565	74328	96901	51234	63316	60614	85120	85303	81669	82782	81265	77344	87281	83095	81516	88000	90822	87433	91420	91870	90377	94954	92249	91463	106333	102407	98099	89378	96130	90912	99716	104931	104273
2		207832	206765	190702	187338	201967	174973	189283	173484	190283	201626	201275	203362	196982	194593	195243	193537	193763	195333	195871	209110	204409	204152	206183	204222	201837	206353	209387	232655	226730	233543	206229	214978	196102	238273	231039	233293
3		312446	302561	305850	272582	284472	273610	265002	274111	256323	293340	300199	291514	252020	269133	262402	251062	261702	251596	294470	300804	292759	288152	241183	251426	245872	244140	258213	303145	305909	317963	277869	266805	285247	275583	278873	266493
4		365384	367322	358340	297322	329079	342784	324003	334799	343438	358886	328835	364154	299998	322185	326727	308086	325080	336830	317658	330479	343075	274890	304423	288448	304784	308153	322019	316097	310491	318470	243037	277610	350225	291571	296137	287766
see related Data (Fig. 1b)

## Sheet: Ext Data Fig. 1d
Extended Data Fig. 1d
NSG mice
Tumour Volume
		Days after challenge	Control sgRNA					Tbk1 sgRNA
		0	0	0	0	0	0	0	0	0	0	0
		6	184.156	130	46.0185	125.854	138.51	82.3959	132.741	87.7436	71.3509	80.142
		9	501.998	260.866	251.637	585.393	558.882	330.972	499.726	257.548	203.25	224.083
		12	993.344	838.451	589.761	1258.44	1535.14	570.377	1149.91	799.425	1072.48	801.398

## Sheet: Extended Data Fig. 1e
Extended Data Fig. 1e
B16 ctl vs Tbk1 sgRNA
Tumour Volumes (mm3)
see related Data (Fig. 1c)
		Days	Ctl sg1					Ctl sg2					Tbk1 sg1					Tbk sg2
		0	0	0	0	0	0	0	0	0	0	0	0	0	0	0	0	0	0	0	0	0
		6	13.5	80	36	36	40.5	49.5	80	96	88	80	88	88	54	72	56	31.5	27	64	45	20
		9	80	367.5	137.5	343	162.5	367.5	318.5	480	212.5	544	392	270	54	63	352	72	125	36	54	49.5
		12	58.5	512	252	1224	688.5	900	343	480	137.5	480	1089	850	54	7	36	27	180	3.5	6	80
		15	355.25	196.625	968	587.25		729	279	480	88	330.75	1210	900	24	0	14	6	125	0	0	80
		18	576	252	1028.5	877.25		1000	269.5	512	80	330.75		1000	16	0	2.5	1	180	0	0	48
		21	1270.5	343	2156	1440			607.5	1149.5	125	1210			112	0	31.5	62.5	352	0	0	56

## Sheet: Extended Data Fig. 1f
Extended Data Fig. 1f
B16-ova
Tumour Volumes
Same as Fig. 1d
		Days	Control										αPD-1										TBK1i										αPD-1+TBK1i
			Mouse 1	Mouse 2	Mouse 3	Mouse 4	Mouse 5	Mouse 6	Mouse 7	Mouse 8	Mouse 9	Mouse 10	Mouse 1	Mouse 2	Mouse 3	Mouse 4	Mouse 5	Mouse 6	Mouse 7	Mouse 8	Mouse 9	Mouse 10	Mouse 1	Mouse 2	Mouse 3	Mouse 4	Mouse 5	Mouse 6	Mouse 7	Mouse 8	Mouse 9	Mouse 10	Mouse 1	Mouse 2	Mouse 3	Mouse 4	Mouse 5	Mouse 6	Mouse 7	Mouse 8	Mouse 9	Mouse 10
		1	103.62	85.53	119.33	89.87	133.82	131.3	120.08	82.97	112.68	130.27	97.1	145.63	83.28	97.25	150.03	71.76	108.37	139.7	112.45	97.58	96.53	147.51	86.61	115.38	139.2	123.01	139.81	74.44	83.72	93.89	156.42	81.93	95.94	72.63	87.69	118.43	120.22	108.32	98.4	149.23
		2	131.52	109.68	168.16	119.35	166.55	184.4	170.93	127.74	156.45	159.65	151.44	196.61	111.24	128.53	189.22	123.53	135.33	181.17	136.42	144.53	123.87	184.1	119.12	164.82	178.34	163.64	174.39	115.05	127.5	137.23	226.22	105.43	127.16	96.18	125.5	157.97	164.6	146.56	149.03	205.13
		5	181.39	182.42	294.03	191.23	263.06	330.48	321.76	189.54	295.08	233.83	302.3	316.02	145.14	155.61	233.81	174.2	193.36	309.35	177.46	228.17	173.44	243.49	214.95	250.51	252.9	219.72	222.81	152.56	200.74	205.99	362.45	137.54	188.87	185.69	178.37	180.61	233.59	214.32	253.22	298.66
		7	206.61	213.65	391.19	224.1	309	473.25	360.82	216.78	399.75	254.24	371.13	417.52	101.87	129.67	244.41	157.5	175.31	445.98	154.55	293.12	185.6	274.44	286.15	336.32	284.79	240.6	208.06	141.45	167.65	189.49	386.44	111.8	174.21	166.5	166.29	120.5	192.65	179.89	355.8	257.74
		9	275.65	342.82	656.32	370.37	530.2	702.04	624.49	304.7	732.12	357.04	505.34	518.89	93.51	130.9	310.09	184.05	121.32	708.22	156.17	424.15	197.19	351.53	510.84	517.33	379.3	358.72	201.6	147.68	192.39	198.11	422.27	88.16	181.53	157.36	167.33	102.85	180.34	157.73	544.25	237.17
		12	394.4	580.32	1050.54	594.14	718.01	1255	1139.46	617.11	1167.85			674.13	87.45	141.21	408.02	302.16	89.77	1209.97	170.01	654.35	233.02	447.27	873.7	687.05	731.77	755.8	393.23	218.67	335.27	361.36	487.34	83.18	167.23	137.85	188.7	80.33	170.9	137.44	783.85	217.25
		14	541.06	1090.93	1787.47	848.48	1285.01	1901.38	1717.27	771.9	1600.26			882.23	76.22	156.28		452.91	83.84	1741.48	185.01		265.74	734.95	1285.35			1292.79	640.83	259.53	682.03	683.73	718.29	78.37	184.12	129.91	304.21	73.47	148.72	108.8	824.06	178.64
		16	628.78	1544.04	2300.72	1199.05	1832.65	2555.81		953.65	2652.34			1098.2	75.09	171.63		706.36	83.69	2314.89	197.32		401.24	903.81	1902.47			2085.89	1079.77	363.86	1402.48	1243.09	902.13	70.28	207.06	117.22	568.86	66.83	126.39	98.02	880.35	170.47

## Sheet: Extended Data Fig. 1g
Extended Data Fig. 1g
B16-ova
Survival
	Days elapsed	Control	αPD-1	TBK1i	αPD-1+TBK1i
	26	1
	19	1
	16	1
	16	1
	16	1
	16	1
	14	1
	23	1
	16	1
	9	1
	9		1
	23		1
	40		1
	30		1
	12		1
	23		1
	35		1
	16		1
	27		1
	14		1
	19			1
	16			1
	18			1
	12			1
	12			1
	16			1
	19			1
	22			1
	19			1
	16			1
	22				1
	40				1
	28				1
	35				1
	26				1
	37				1
	28				1
	37				1
	23				1
	26				1

## Sheet: Extended Data Fig. 1h
Extended Data Fig. 1h
B16-ova
Body Weight (grams)
Day 14
		Control	αPD-1	TBK1i	αPD-1+TBK1i
	Mouse 1	19.78		19.74	21.73
	Mouse 2	21.89	22.58	21.03	18.2
	Mouse 3	22.79	18.03	22.7	18.11
	Mouse 4	22.89	20.52		19.32
	Mouse 5	20.08			20.61
	Mouse 6	25.29	21.09	21.91	18.23
	Mouse 7	18.83	19.47	20.43	21.88
	Mouse 8	19.9	27.63	16.93	15.98
	Mouse 9	23.54	19.37	21.47	17.73
	Mouse 10			18.96	21.08
	Blank Space = no data available (mouse sacrified for reaching tumour burden limit)

## Sheet: Extended Data Fig. 1i
Extended Data Fig. 1i
CT26 MDOTS
Viability
				Raw
			DMSO+IgG	1595374	1046303	1569054
			TBK1i+IgG	598583	524257	482931
			αPD-1	399946	293612	696704
			αPD-1+TBK1i	116721	142166	256826
			αCD8+DMSO+IgG	1089756	1381166	2181433
			αCD8+TBK1i+IgG	494329	565273	756947
			αCD8+αPD-1	987431	1407404	738384
			αCD8+αPD-1+TBK1i	849980	1003145	670900
				Fold Change
			DMSO+IgG	1	0.655836	0.983502
			TBK1i+IgG	0.375199	0.32861	0.302707
			αPD-1	0.250691	0.18404	0.436703
			αPD-1+TBK1i	0.0731622	0.0891117	0.160982
			αCD8+DMSO+IgG	0.683072	0.865732	1.36735
			αCD8+TBK1i+IgG	0.309851	0.35432	0.474464
			αCD8+αPD-1	0.618934	0.882178	0.462828
			αCD8+αPD-1+TBK1i	0.532778	0.628784	0.420528
				Log2 fold change
			DMSO+IgG	0	-0.608594	-0.0239997
			TBK1i+IgG	-1.41427	-1.60555	-1.72401
			αPD-1	-1.99602	-2.44191	-1.19528
			αPD-1+TBK1i	-3.77276	-3.48824	-2.63503
			αCD8+DMSO+IgG	-0.54989	-0.208008	0.451381
			αCD8+TBK1i+IgG	-1.69035	-1.49687	-1.07563
			αCD8+αPD-1	-0.692143	-0.180858	-1.11145
			αCD8+αPD-1+TBK1i	-0.908393	-0.669365	-1.24972

## Sheet: Extended Data Fig. 1j
Extended Data Fig. 1j
MC38
Tumour Volumes (mm3)
	Days	Control										αPD-L1										TBK1i										αPD-L1+TBK1i
	0	114.14	89.04	129.65	123.72	105.27	117.87	143.49	124.19	116.73	142.73	114.92	115.72	125.45	116.32	101.44	97.33	142.84	118.54	142.24	131.86	90.39	148.61	117.39	116.31	124.51	101.28	114.35	130.67	123.78	139.61	111.32	118.83	114.05	103.73	150.79	100.74	116.79	132.07	133.16	125.24
	4	194.34	73.04	350.25	247.1	134.29	242.98	328.62	273.03	139.09	377.09	285.39	66.8	278.34	259.72	142.46	112.53	321.38	211.07	392.72	224.31	56.1	319	114.94	112.36	141.53	158.78	66.22	216.18	129.87	89.36	183.61	173.18	166.55	134.22	232.09	110.22	104.17	219.43	191.52	117.49
	7	261.57	77.45	381.88	392.02	187.09	331.71	558.27	397.3	191.46	423.08	219.72	67.03	372.05	345.77	119.07	103.32	310.67	251.85	397.48	191.24	41.06	378.14	101.7	227.59	209.17	231.26	64.75	254.29	209.94	65.77	123.46	100.37	95.58	139.68	258.73	148.59	85.65	302.57	196.06	85.3
	11	376.45	99.33	790.03	530.35	312.19	902.06	810.92	760.21	379.67	483.81	255.49	43.59	367.59	655.31	141.55	149.36	359.21	257.38	725.17	181.7	119.51	740.95	238.8	396.4	400.28	561.69	183.01	350.77	345.7	214.42	189.19	43.07	47.08	86.15	773.18	76	56.62	798.58	389.78	88.89
	14	444.03	94.33	1074.66	684.69	327.25	1105.68	823.99	917.27	513.84	618.9	418.47	70.2	356.1	806.61	109.3	245.14	414.83	306.76	923.19	271.1	137.32	1047.07	302.83	494.37	353.41	627.94	186.06	402.52	540.77	274.42	247.6	31.91	23.24	104.56	930.46	94.35	39.43	864.99	463.13	69.94
	19	655.56	343.3	2612.64	1579.69	426.84	1370.13	1068.42	1934.73	827.68	866.3	867.07	39.92	646.7	896.17	137.86	305.45	451.15	557.01	1451.65	324.49	334.8	2206.59	1098.39	1835.98	1020.7	1237.12	412.86	953.62	1053.91	1185.78	379.04	23.82	20.93	93.98	1484.34	198.87	26.32	1516.72	850.96	139.28
	22	1140.93	349.06		2225.08	931.52	1312.87	2458.54	2778.43	1005.17	1399.71	1498.34	44.69	1013.8	1016.04	90.04	499.08	770.28	770.3		452.2	579.37		1464.72	2448.05	1602.6	1452.38	456.79	1240.75	1905.85	2589.88	712	14.5	20.96	140.46		236.45	33.75		1674.83	307.26
	25	1432.04	416.42			1281.33	1575.01			1123.04	2069.14	1930.06	15.07	1193.89	1650.37	66.57	698.15	1068.26	907.28		745.53	404.13		3262.86			2058.78	1085.24	1522.45	2607.45			18.39	14.09	175.6		421.9	23.21		2033.63	382.47

## Sheet: Extended Data Fig. 1k
Extended Data Fig. 1k
MB49
Tumour Volumes (mm3)
		Time (days)	Control										αPD-L1										TBK1i										αPD-L1+TBK1i
		0	76.83	91.7	69.77	93.31	81.89	77.51	79.11	98.75	85.32	84.81	71.48	96.42	76.67	77.49	88.14	82.93	87.91	78.51	97.16	82.24	84.66	99.22	77.75	74.74	81.85	92.53	85.62	79.73	91.63	71.05	70.4	80.92	100.69	93.44	89.92	87.35	73.45	82.82	78.39	81.66
		3	183.19	324.19	116.9	212.4	427.19	612.98	214.8	353.14	230.85	131.06	247.75	196.61	261.29	233.77	230.84	433.58	543.92	370.3	527.47	322.95	133.62	1466.66	202.4	93.11	118.07	270.23	206.01	118.69	788.07	159.98	485.58	89.37	579.53	145.12	162.95	253.46	113.55	168.67	163.32	437.97
		7	430.39	304.7	210.07	351.32	651.87	1153.77	510.35	671.68	355.94	196.61	188.33	246.09	300.78	312.58	271.82	494.58	712.83	340.76	787.85	271.31	175.49	1355.39	354.19	172.77	199.53	399	338.52	159.85	955.7	299.2	308.17	63.58	853.31	74.38	101.63	121.62	102.49	89.9	147.4	278.95
		11	543.68	410.94	719.84	568.73		1921.94	1057.84	1457.2	778.37	269.41	482.45	363.55	446.91	546.44	427.4	1249.59		549.67	1334.17	380.86	179.63		396.27	283.49	220.43	540.52	457.41	283.11	1201.06	183.87	455.74	44.27	1643.53	61.33	46.76	126.15	137.19	94.97	238.29	510.03
		14	684.07	708.7	720.44				1584.04	1873.95	1361.09	533.1	792.73	561.54	637.03	688.78	635.37	2080.5		904.01	3253.53	590.51	196.29		700.47	521.71	385.02	676.34	632.37	407.93	1365.71	261.99	1089.72	50.87	2437.58	86.11	31.06	183.09	168.26	187.91	381.22	771.05
		18	1214.94	1553.43	1490.68				3452.14	1762.27	1942.96	710.89	666.84	845.66	1059.56	1090.28						1162.14	454.84		940.94	981.32	739.08	1323.01	1261.33	1110.32		570.75	1973.88	59.49		190.02	39.84	542.76	309.67	446.43	631.43	2576.79
		21	1714.8	2239.95	2457.32					2332.38		1108.63	1158.02	826.01	1629.21	1430.1							713.24			1219.59	1110.27	1873.5	1910.32	1269.08		776.42		60.22		289.05	37.67	673.27	463.23	596.19	918.86
		25	3052.98									2658.55		1587.33		2605.2							1135.8			1276.45	1783.48	3013.71	3410.54	2234.24		1176.08		89.55		681.57	152.96	1292.41	1015.25	1419.38	1619.01

## Sheet: Extended Data Fig. 2a
Extended Data Fig. 2a
PDOTS Patient Data
PDOTS ID	Age	Sex (M/F)	Tumor Type	Stage	Mutational Status	Microsatellite Insability (MSI/MSS)	Prior Therapy	Therapy at Time of Biopsy	Response to Treatment (R/NR)	Site	Subsequent Therapy
1	61	M	Cutaneous melanoma	IV	TP53, CDKN2A	N/A	anti-CTLA-4; anti-PD-1	anti-PD-1	NR	Lymph Node	Clinical trial
2	78	F	Merkel cell carcinoma	III	N/A	N/A	None	None	N/A	Primary (skin)	None
3	54	M	Renal cell carcinoma	IV	N/A	N/A	anti-PD-1	anti-PD-1	NR	Metastasis (soft tissue)	N/A
4	85	F	Colorectal carcinoma	IIIB	BRAF V600E	MSI	None	None	N/A	Primary (Colon)	adjuvant chemotherapy
5	65	M	Cutaneous melanoma	IV	TERT	N/A	None	anti-PD-1	NR	Lymph Node	None
6	65	M	Cutaneous melanoma	IV	TERT	N/A	None	anti-PD-1	NR	Metastasis (Lung)	None
7	72	F	Colorectal carcinoma	II	N/A	MSI					None
8	73	M	Cutaneous melanoma	IV	TP63, DDX3X, PIK3CA, BRAF, TSC2, MYC, TERT, SMARCA4	N/A	clinical trial, combination immunotherapy	anti-PD-1	NR	metastasis (abdomen)	N/A
9	73	M	Cutaneous melanoma	IV	TP63, DDX3X, PIK3CA, BRAF, TSC2, MYC, TERT, SMARCA4	N/A	clinical trial, combination immunotherapy	anti-PD-1	NR	metastasis (abdomen)	N/A
10	70	F	Ocular melanoma	IV	N/A	N/A	None	None	N/A	metastasis (liver)	N/A
11	66	M	Cutaneous melanoma	IV	MYC, CDKN2A and NRAS	N/A	anti-CTLA-4; ERK inhibitor; immunotherapy combination clinical trials	clinical trial	NR	metastasis (pleural fluid)	N/A
12	66	M	Cutaneous melanoma	IV	MYC, CDKN2A and NRAS	N/A	anti-CTLA-4; ERK inhibitor; immunotherapy combination clinical trials	clinical trial	NR	metastasis (pleural fluid)	N/A
13	63	M	Cutaneous melanoma	IV	N/A	N/A	anti-PD-1; combined PD-1/CTLA-4 blockade	anti-CTLA-4; anti-PD-1	NR	metastasis (pleural fluid)	N/A
14	60	M	Acral melanoma	IIIC	MAP3K1	N/A	None	None	N/A	primary (foot)	N/A
15	77	F	Colorectal carcinoma	III	N/A	MSS	None	None	N/A	Primary (small intestine)	N/A
16	56	M	Cutaneous melanoma	IV	PIK3CA, CDKN2A, TERT and MEN1	N/A	anti-PD-1; combined PD-1/CTLA-4 blockade; MEK inhibitor	Binimetinib	Mixed Response	metastasis (bone)	N/A
17	61	M	Cutaneous melanoma	IV	NRAS, TERT, and FBXW7	N/A	anti-CTLA-4, anti-PD-1, intralesional therapy	None	NR	metastasis (small intestine)	N/A
18	61	M	Cutaneous melanoma	IV	NRAS, TERT, and FBXW7	N/A	anti-CTLA-4, anti-PD-1, intralesional therapy	None	NR	metastasis (lymph node)	N/A
19	80	F	Cutaneous melanoma	III	N/A	N/A	None	None	N/A	Lymph Node	N/A
20	77	F	Merkel cell carcinoma	IV	TP53, RB1, FLT3 and PDGFRA. AMERK (MCPyV) negative	N/A	PD-1 blockade and radiation	anti-PD-1	NR	metastasis (liver)	N/A
21	75	M	Cutaneous melanoma	IV	TERT, CDKN2A, PTEN, NF1 and BRAF V600K	N/A	immunotherapy combination clinical trial	anti-PD-1	Mixed Response	Lymph Node	N/A
22	35	F	Cutaneous melanoma	III	BRAF V600E	N/A	None	None	N/A	Lymph Node	N/A
23	63	M	Colorectal carcinoma	III	N/A	MSS	None	None	N/A	Primary (Colon)	N/A
24	71	F	Cutaneous melanoma	IV	BRAF V600E	N/A	adjuvant interferon a2b; combination clinical trials after recurrence	anti-PD-1	NR	metastasis (skin)	N/A
25	66	F	pancreatic adenocarcinoma	IV	N/A	N/A	chemotherapy and radiation	chemotherapy	N/A	metastasis (ascites)	N/A
26	58	M	head and neck squamous cell carcinoma	III	N/A	N/A	None	None	N/A	R partial glossectomy	N/A
27	47	F	triple negative breast cancer	IV	TP53	N/A	chemotherapy and radiation	None	N/A	metastasis (pleural fluid)	N/A
28	78	M	Merkel cell carcinoma	II	N/A	N/A	None	None	N/A	Primary (skin)	N/A
29	66	F	Colorectal carcinoma	IV	N/A	MSS	chemotherapy	None	N/A	metastasis (liver)	N/A
30	57	F	Colorectal carcinoma	IV	N/A	MSS	chemotherapy	None	N/A	metastasis (liver)	N/A

[truncated: 28 more sheets: Extended Data Fig. 2b, Extended Data Fig. 3g, Extended Data Fig. 3h-k, Extended Data Fig. 4a, Extended Data Fig. 6c, Extended Data Fig. 6e, Extended Data Fig. 6f, Extended Data Fig. 6g, Extended Data Fig. 6h, Extended Data Fig. 6i, Extended Data Fig. 7a, Extended Dat Fig. 7b-c, Extended Data Fig. 7d-e, Extended Data Fig. 8a, Extended Data Fig. 8b, Extended Data Fig. 8c, Extended Data Fig. 8d, Extended Data Fig. 8e, Extended Data Fig. 8j, Extended Data Fig. 9a …]
